# Supplementary material for: Perspectives on the energy landscape of Au–Cl binary systems from the structural phase diagram of AuxCly (x + y = 20)
Source: Royal Society of Chemistry journal article supplement (doi:10.1039/c5cp01863c), 2015-01-01
Supplement: c5cp01863c1.pdf [file c5cp01863c1.pdf]

## Electronic Supplementary Information (ESI)

### **Perspectives on the energy landscape of Au-Cl binary system from the structural phase diagram of $\text{Au}_x\text{Cl}_y$ ( $x + y = 20$ )**

By

Zhimei Tian,<sup>a,b</sup> and Longjiu Cheng<sup>a\*</sup>

<sup>a</sup>Department of Chemistry, Anhui University, Hefei, Anhui, 230601, China.

<sup>b</sup>School of Chemistry and Materials Engineering, Fuyang Teachers College, Fuyang, Anhui, 236037, China.

\*Corresponding authors. E-mail: clj@ustc.edu (L.C.)

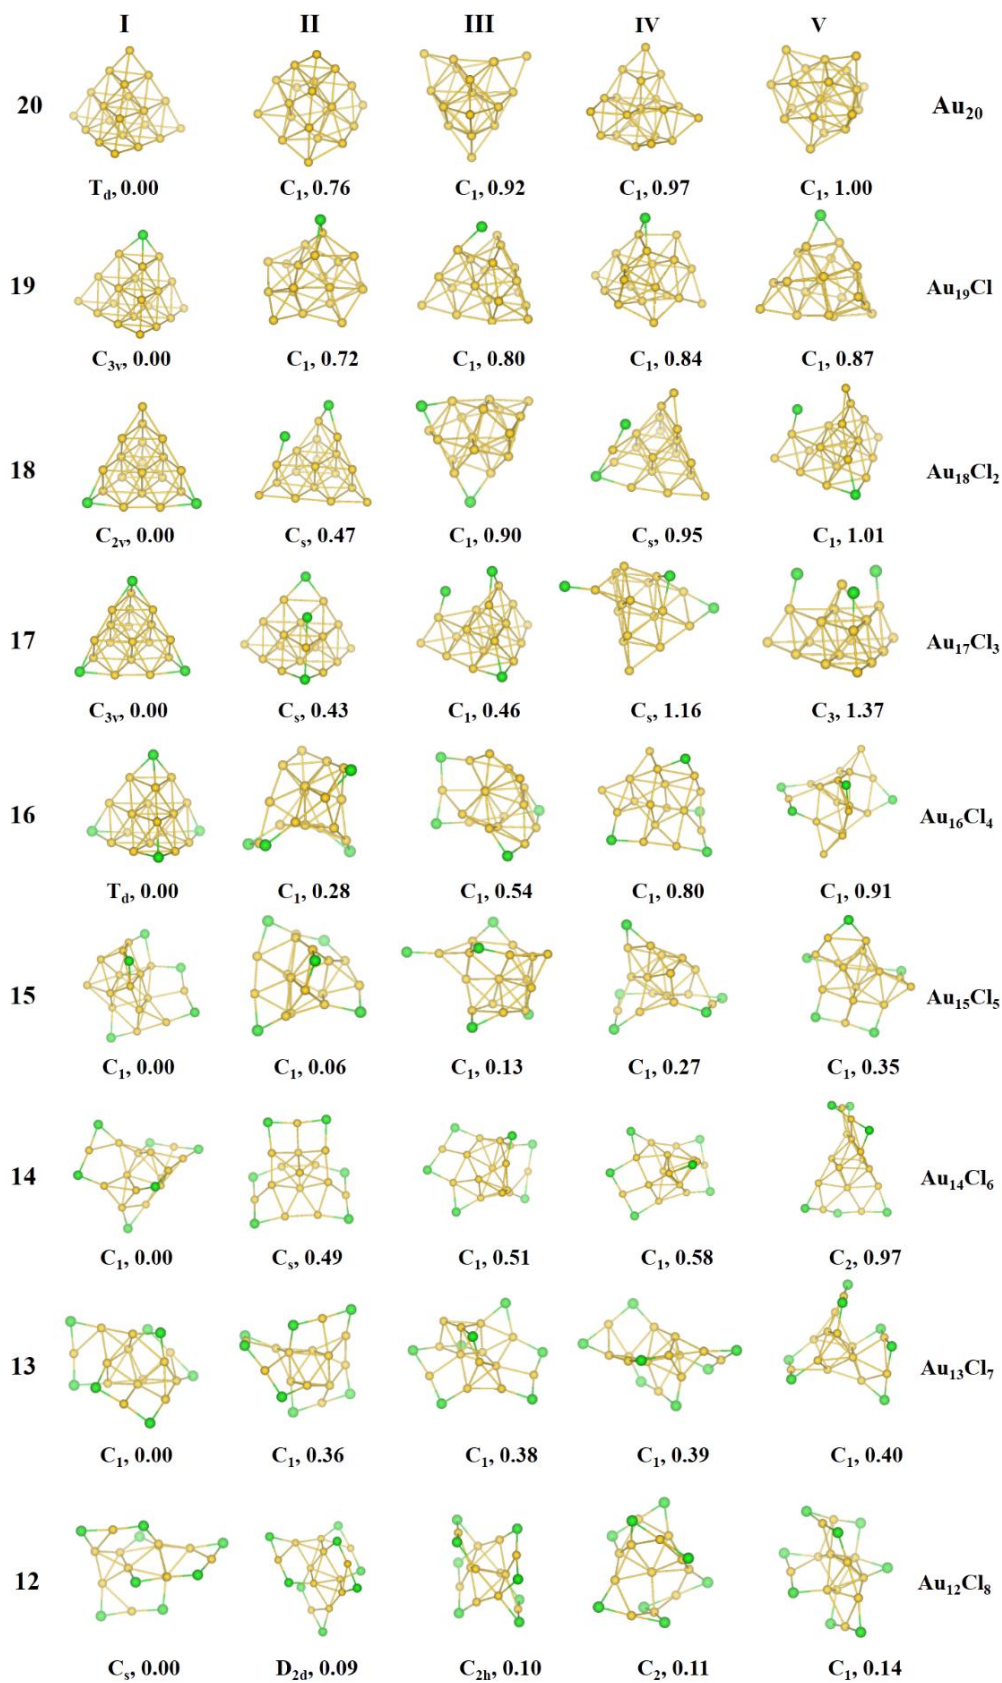

**Fig. S1** Optimized structures and relative stability of Au<sub>12</sub>Cl<sub>8</sub>-Au<sub>20</sub> at TPSS/Def2-TZVP (Au) and 6-311G\* (Cl) level of theory. Au, yellow, Cl, green.

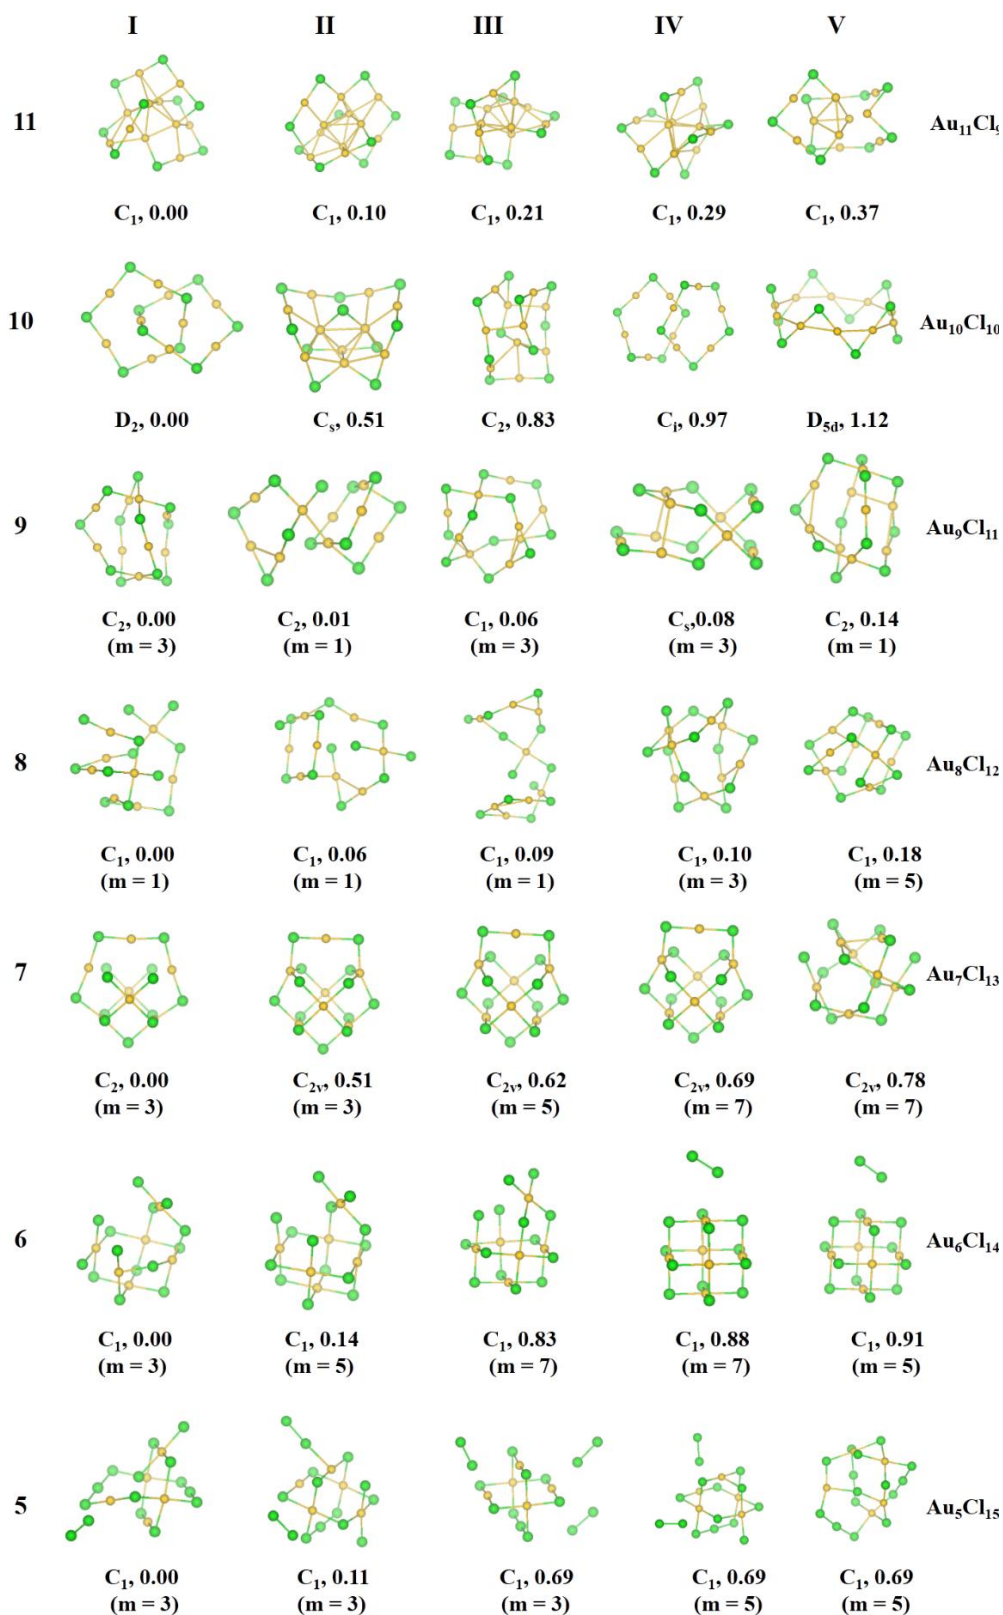

**Fig. S2** Optimized structures and relative stability of  $\text{Au}_5\text{Cl}_{15}$ - $\text{Au}_{11}\text{Cl}_9$  at TPSS/Def2-TZVP (Au) and 6-311G\* (Cl) level of theory. Au, yellow, Cl, green. When  $x \leq 9$ , the multiplicity of the molecule is shown in the bracket.

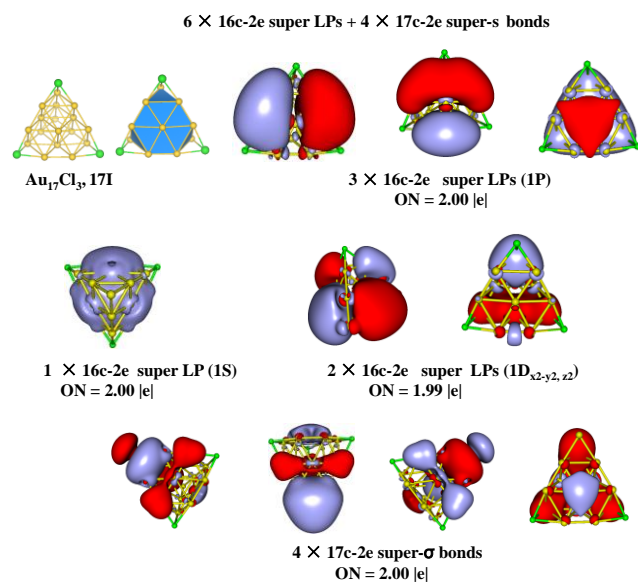

**Fig. S3** Superatomic-molecule model and AdNDP localized natural bonding orbitals of 17I.

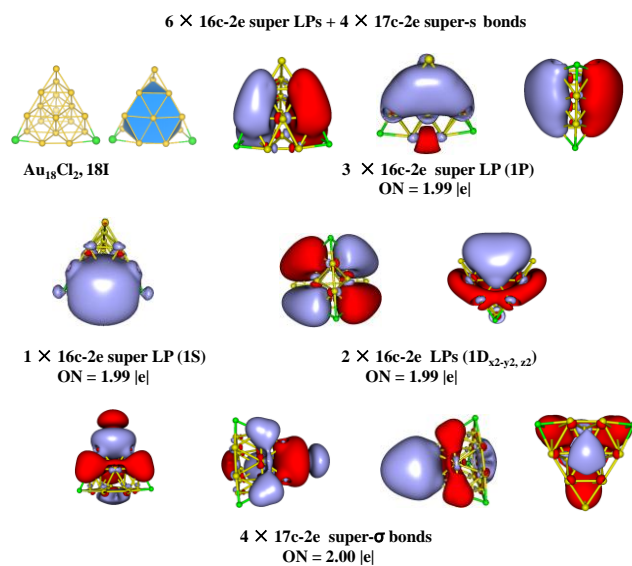

**Fig. S4** Superatomic-molecule model and AdNDP localized natural bonding orbitals of 18I.

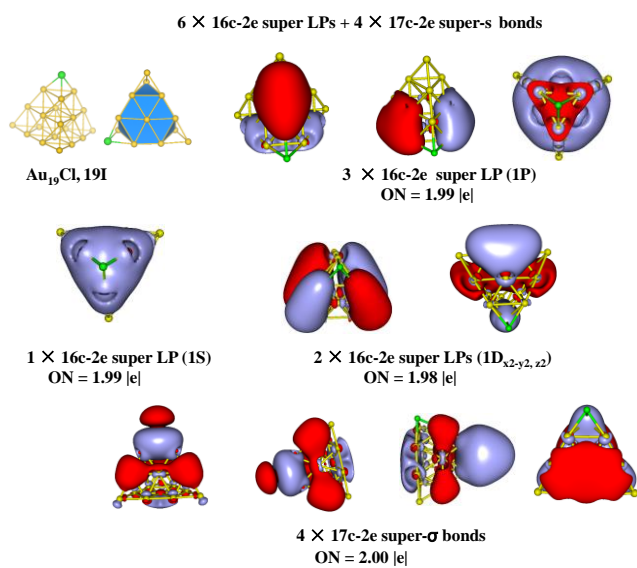

**Fig. S5** Supratomic-molecule model and AdNDP localized natural bonding orbitals of 19I.
